# Supplementary material for: Phase 1 trial of the safety, pharmacokinetics, and antiviral activity of EDP-514 in untreated viremic chronic hepatitis B patients
Source: PubMed Central journal article supplement — Clin Mol Hepatol. 2024 Mar 26;30(3):375–87. doi: 10.3350/cmh.2023.0535 (PMC11261219; doi:10.3350/cmh.2023.0535), 2024-03-26
Supplement: cmh-2023-0535-Supplementary-Fig-1.pdf [file cmh-2023-0535-Supplementary-Fig-1.pdf]

### C. Supplementary HBV Figures

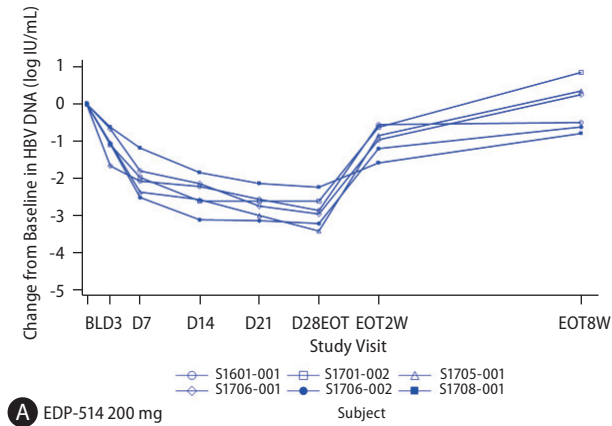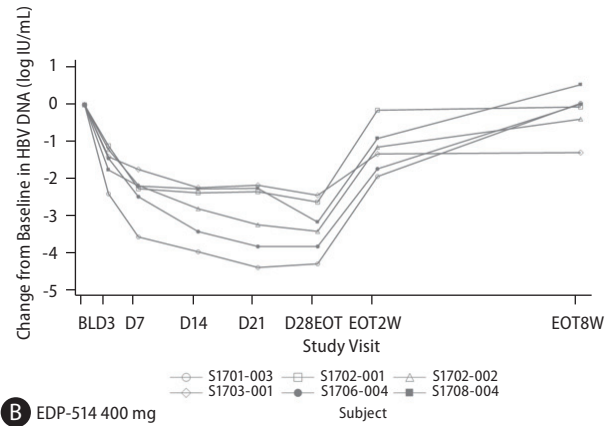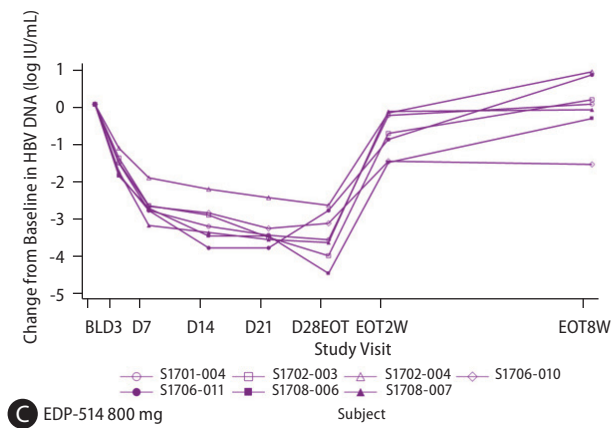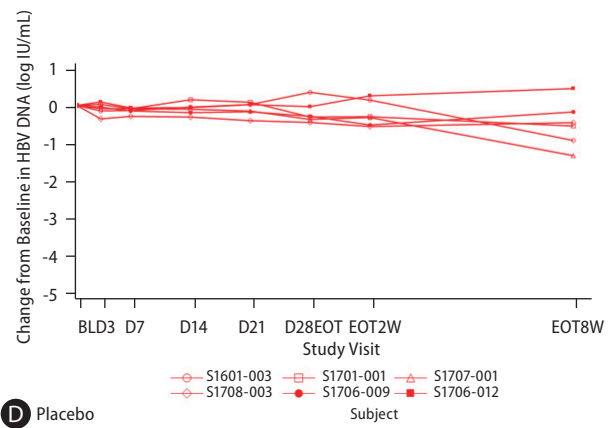

**Supplementary Figure 1.** Change in baseline in HBV DNA (log IU/mL) in individual patients. HBV, hepatitis B virus.
