# Supplementary material for: Phase 1 trial of the safety, pharmacokinetics, and antiviral activity of EDP-514 in untreated viremic chronic hepatitis B patients
Source: PubMed Central journal article supplement — Clin Mol Hepatol. 2024 Mar 26;30(3):375–87. doi: 10.3350/cmh.2023.0535 (PMC11261219; doi:10.3350/cmh.2023.0535), 2024-03-26
Supplement: cmh-2023-0535-Supplementary-Fig-4.pdf [file cmh-2023-0535-Supplementary-Fig-4.pdf]

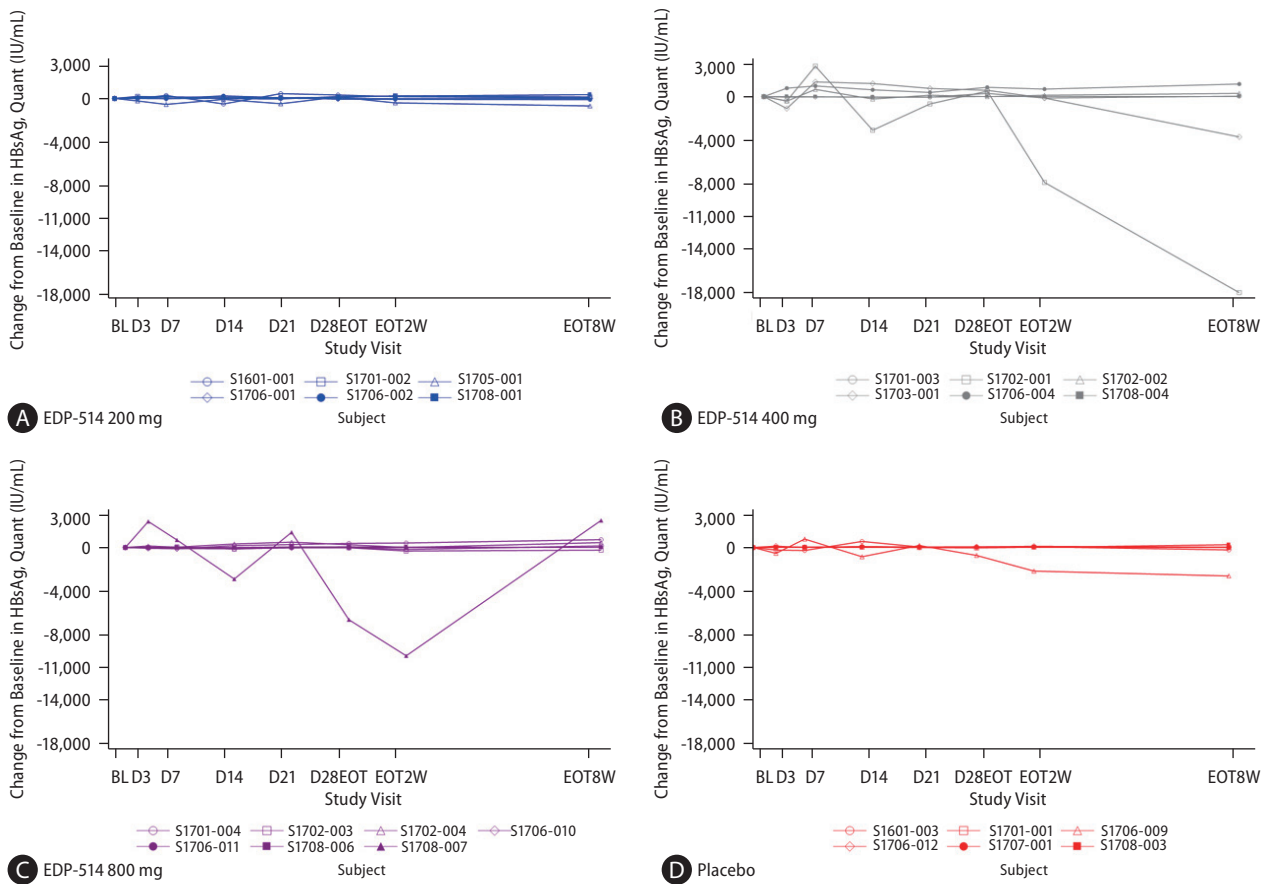

**Supplementary Figure 4.** Change in baseline in HBsAg (IU/mL) in individual patients. HBsAg, hepatitis B surface antigen.
