# Supplementary figures and images for: Phase 1 trial of the safety, pharmacokinetics, and antiviral activity of EDP-514 in untreated viremic chronic hepatitis B patients
Source: PubMed Central journal article supplement — Clin Mol Hepatol. 2024 Mar 26;30(3):375–87. doi: 10.3350/cmh.2023.0535 (PMC11261219; doi:10.3350/cmh.2023.0535), 2024-03-26

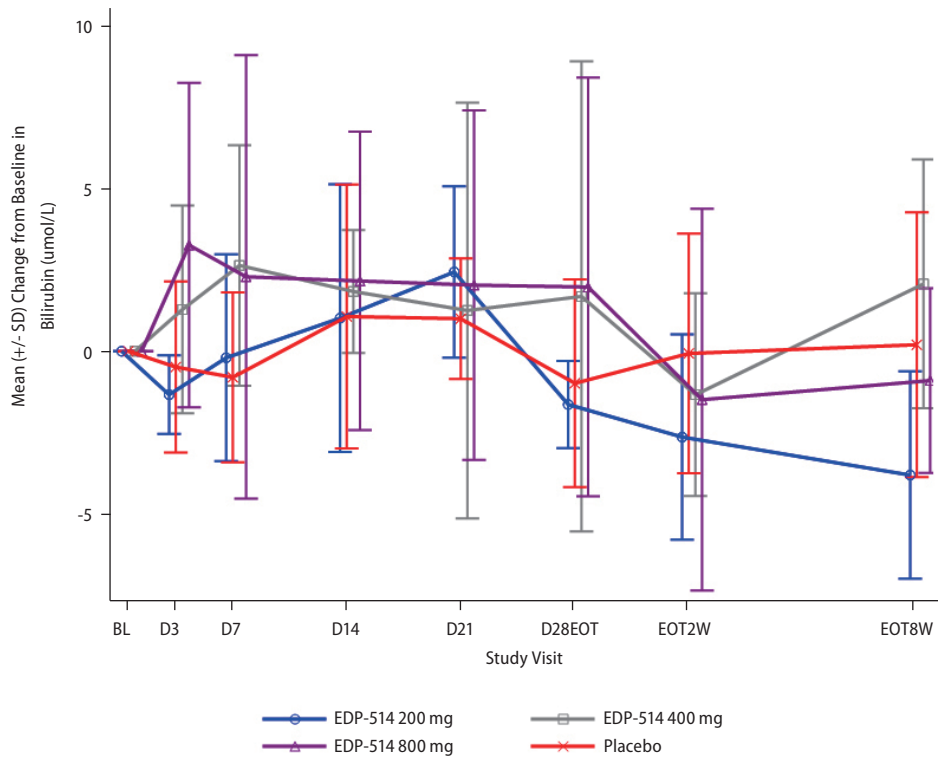

**Supplementary Figure 8.** Mean (standard deviation [SD]) change from baseline in Bilirubin over time.

Supplement: cmh-2023-0535-Supplementary-Fig-8.pdf [file cmh-2023-0535-Supplementary-Fig-8.pdf]
